# Supplementary material for: Comparing alcohol taxation throughout the European Union
Source: PubMed Central journal article supplement — Addiction. 2019 May 30;114(8):1489–94. doi: 10.1111/add.14631 (PMC6771486; doi:10.1111/add.14631), 2019-05-30

# Comparing alcohol taxation across the European Union: Appendix

Figure S1: Alcohol tax structure graphs for every EU member state

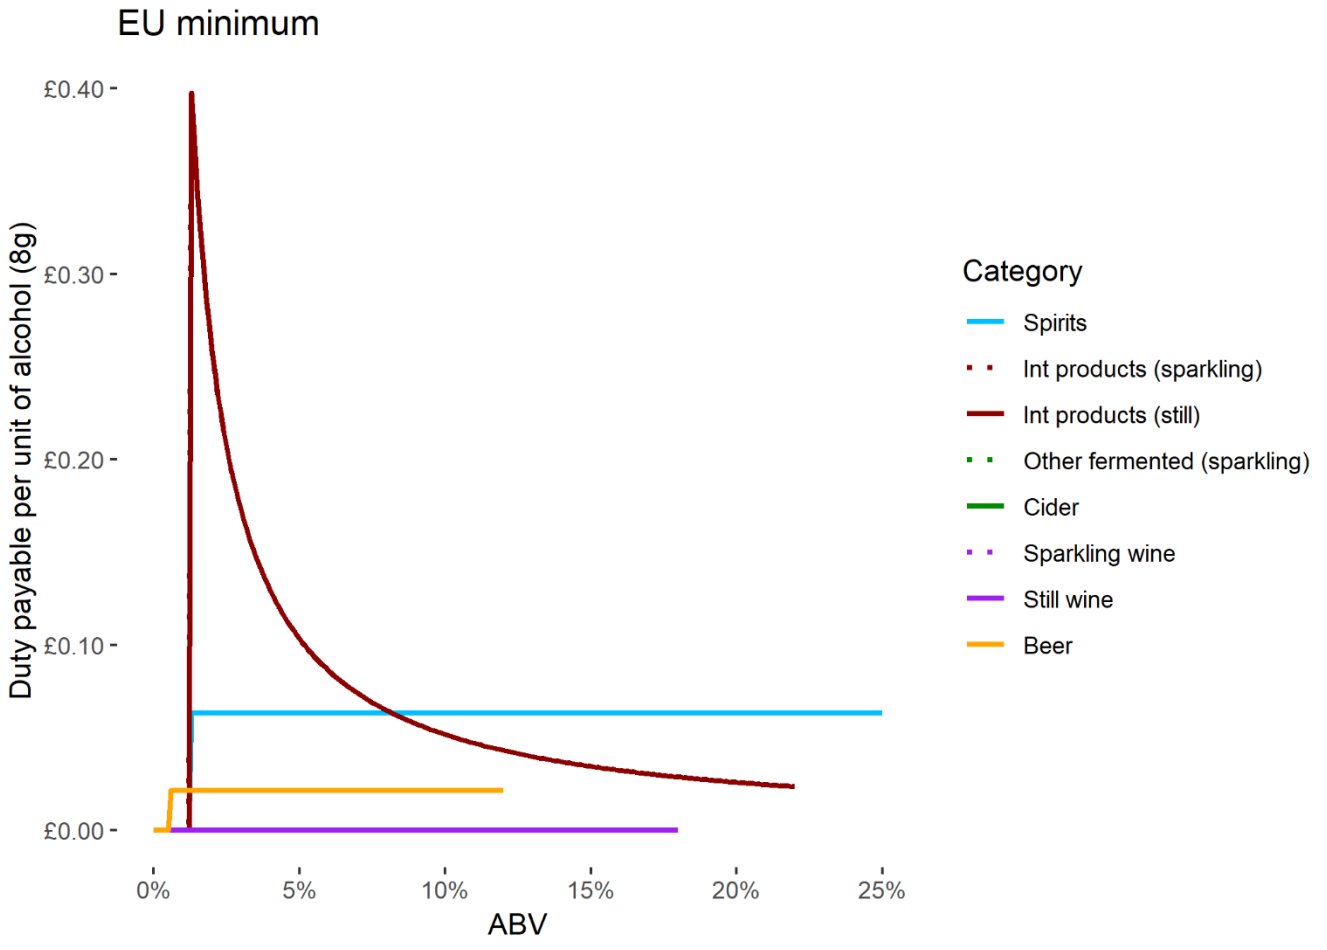

### Austria

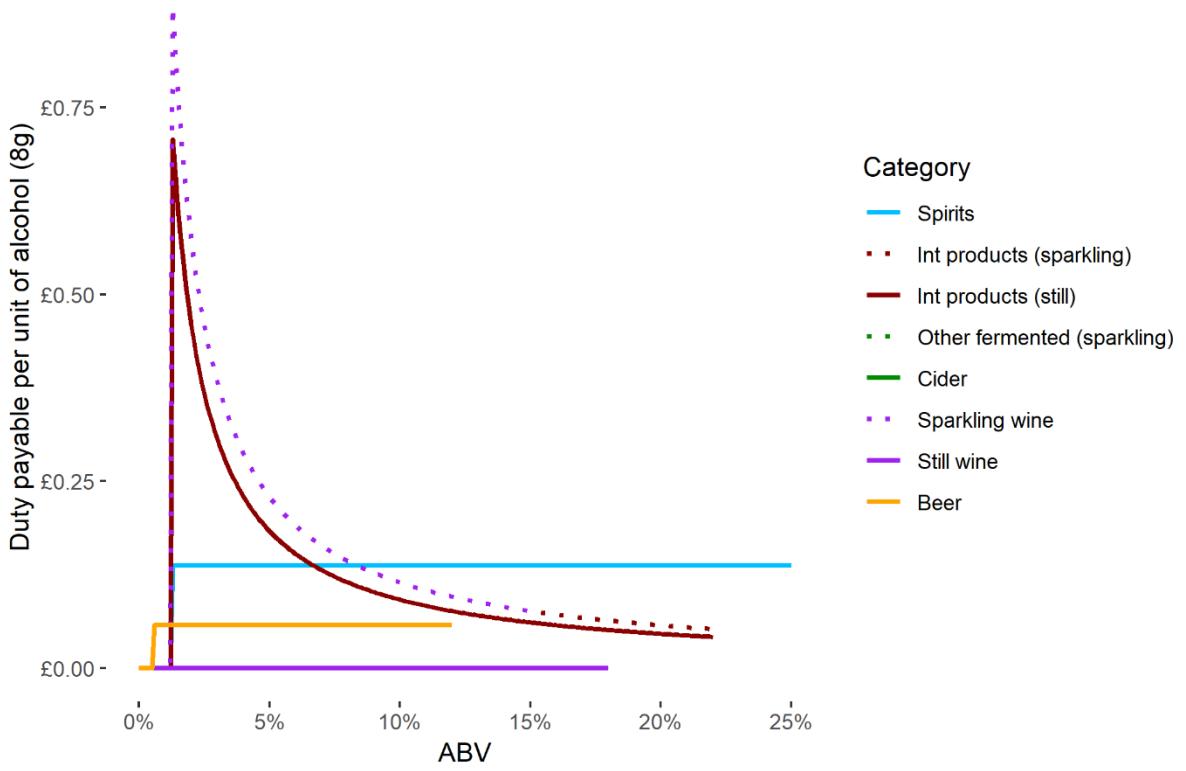

### Belgium

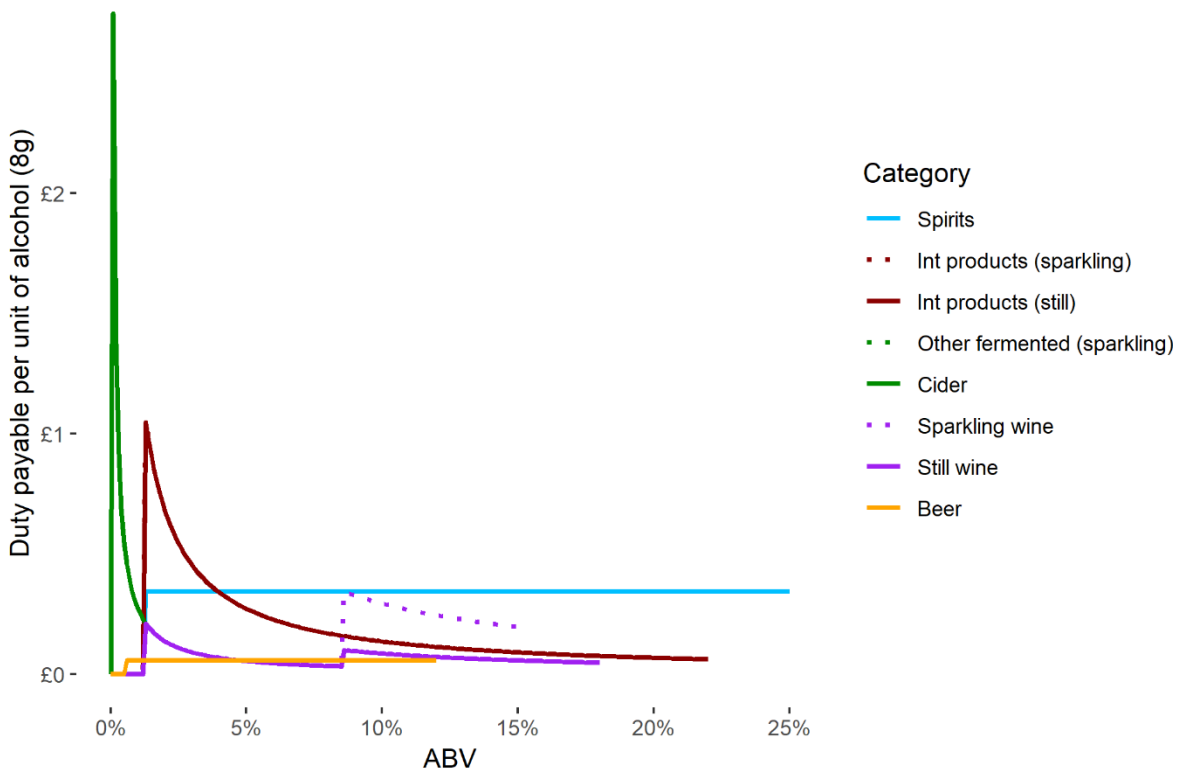

### Bulgaria

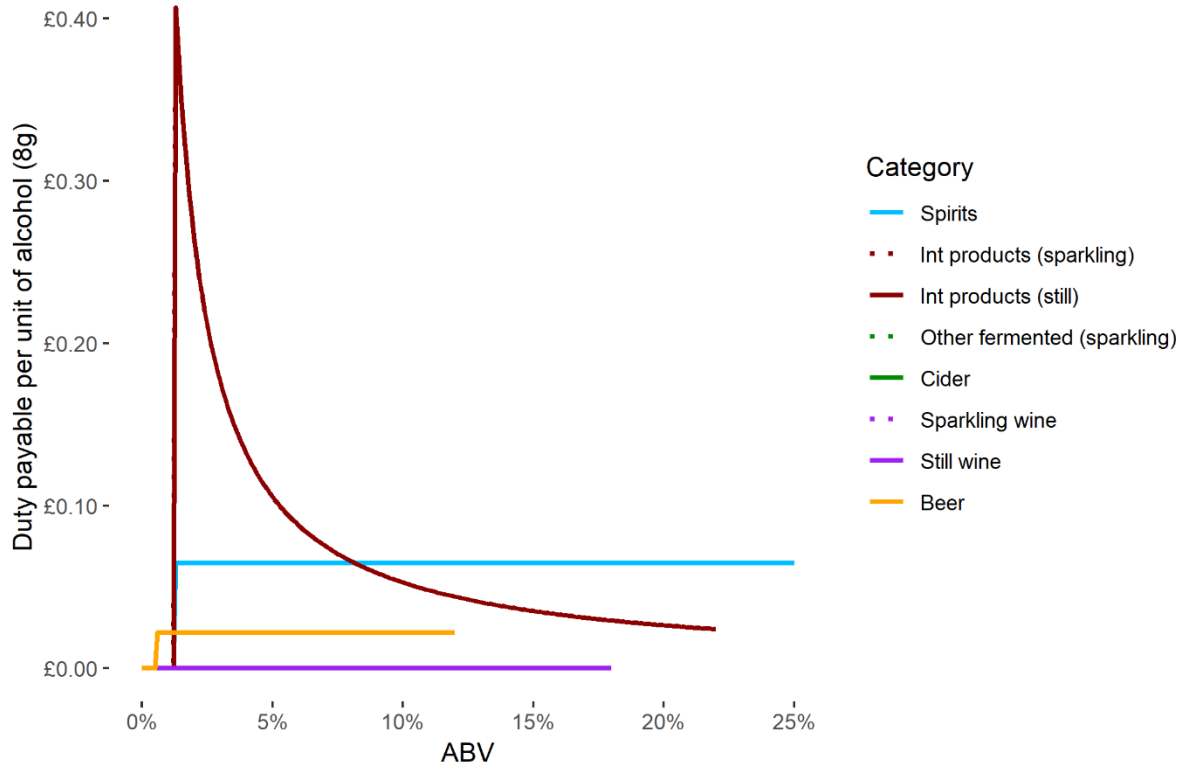

### Croatia

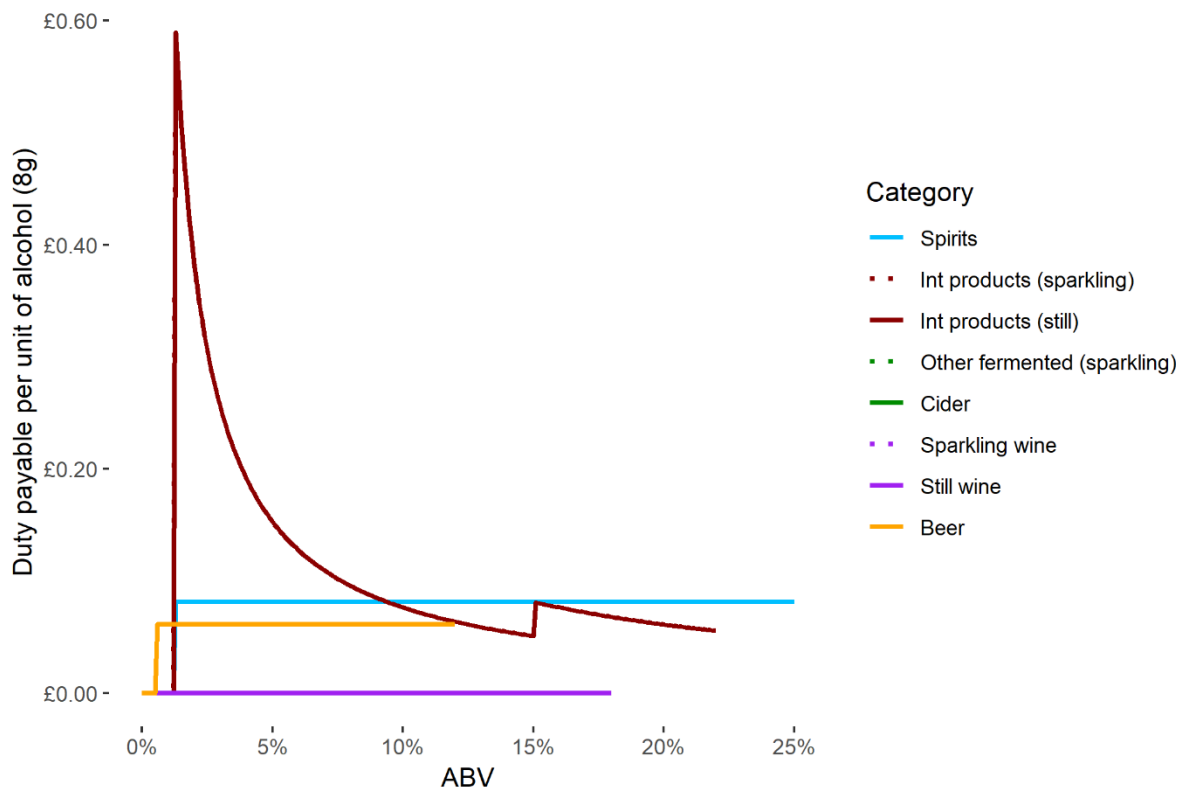

### Cyprus

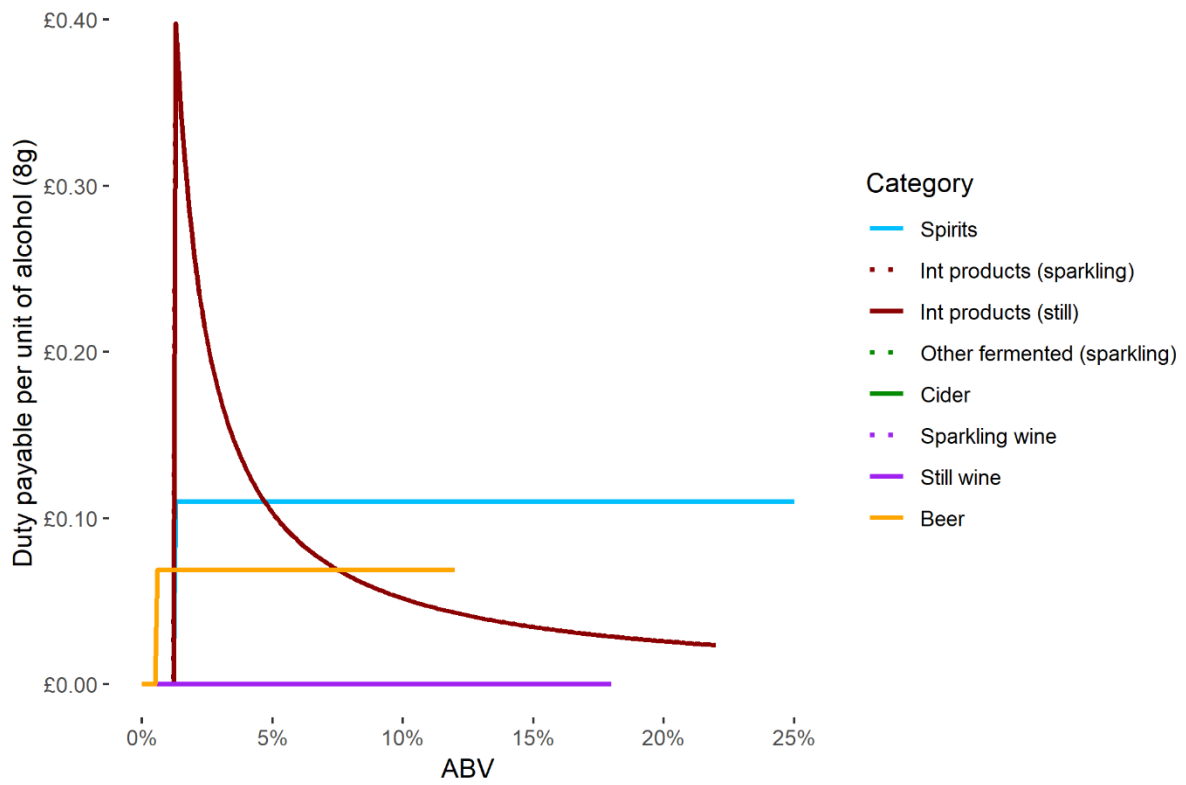

### Czech Republic

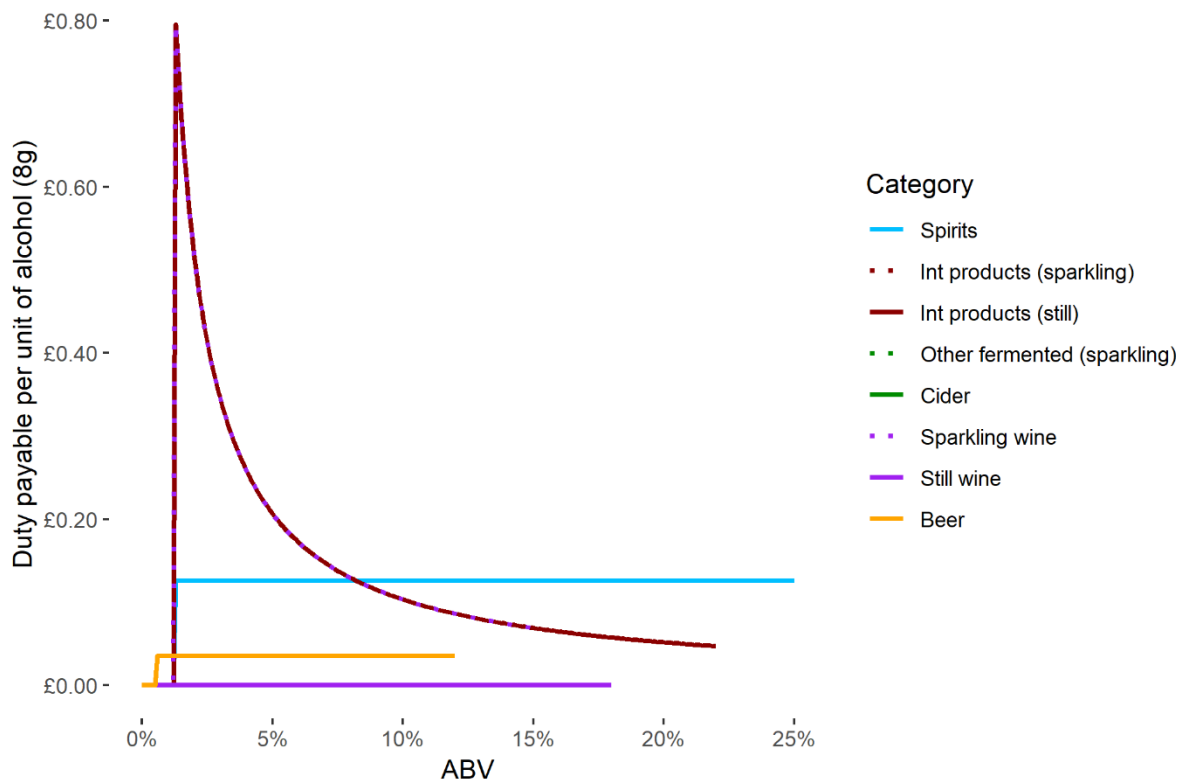

### Denmark

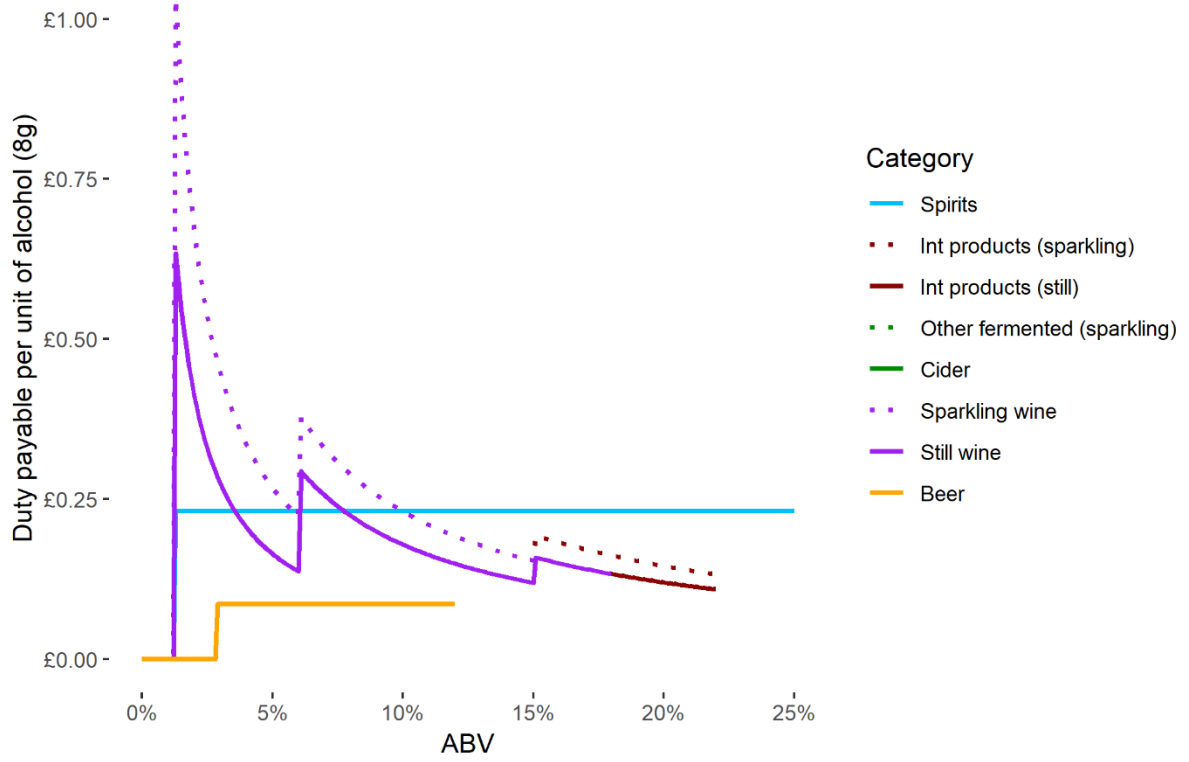

### Estonia

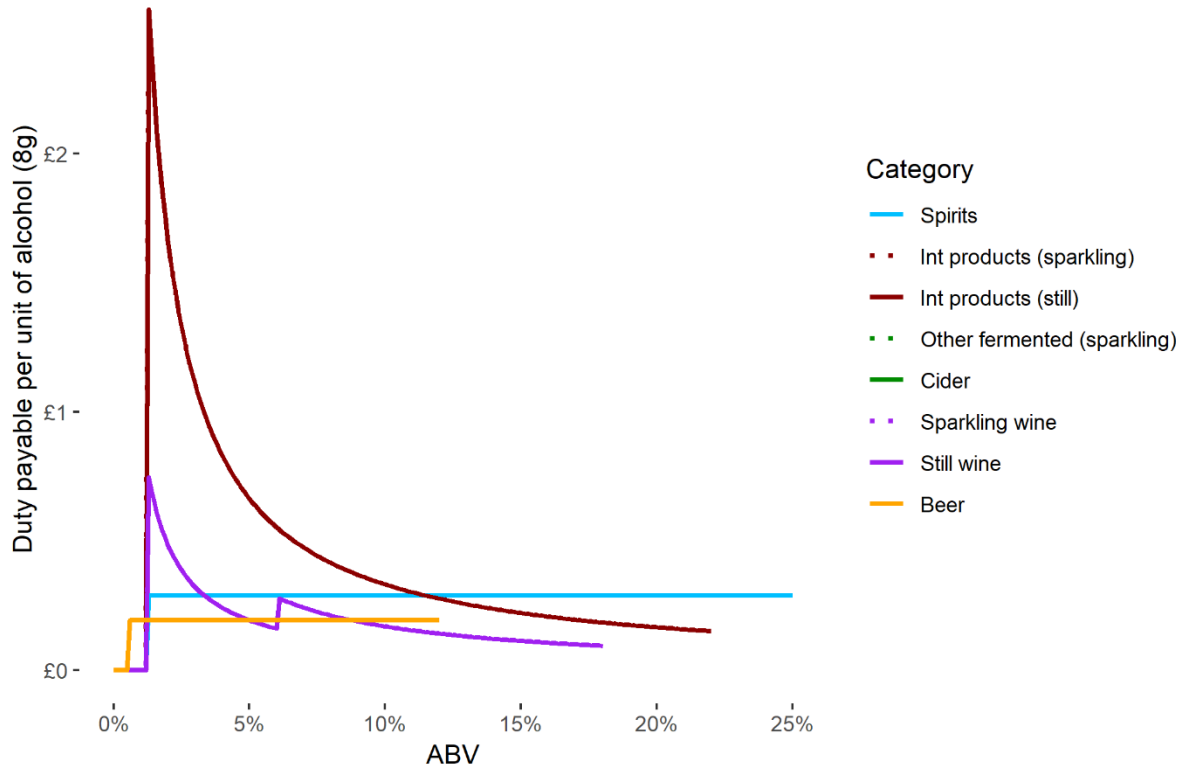

### Finland

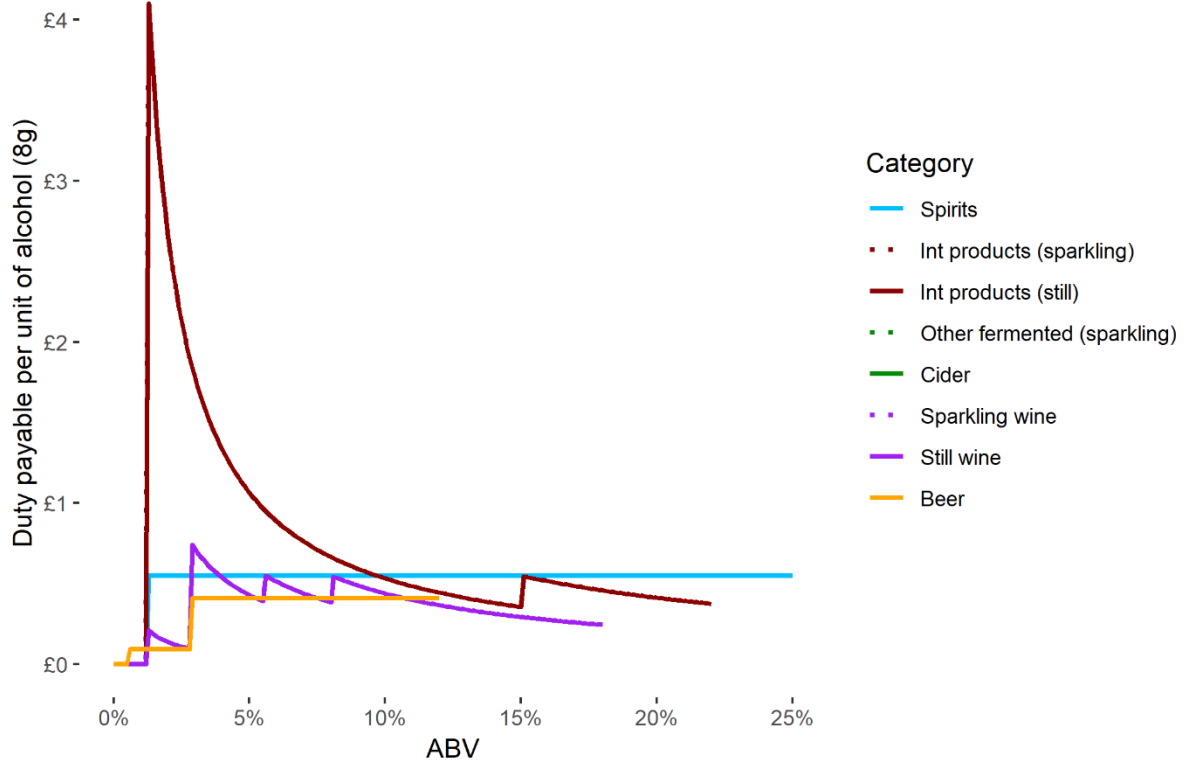

### France

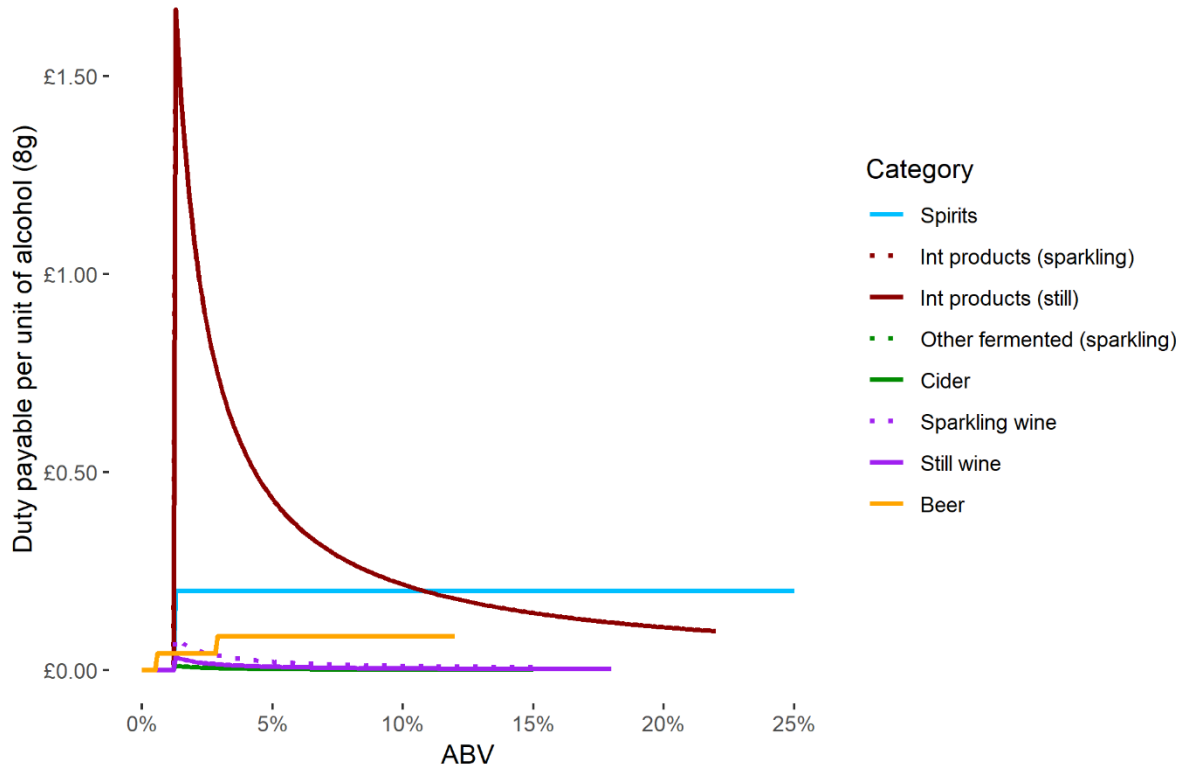



### Hungary

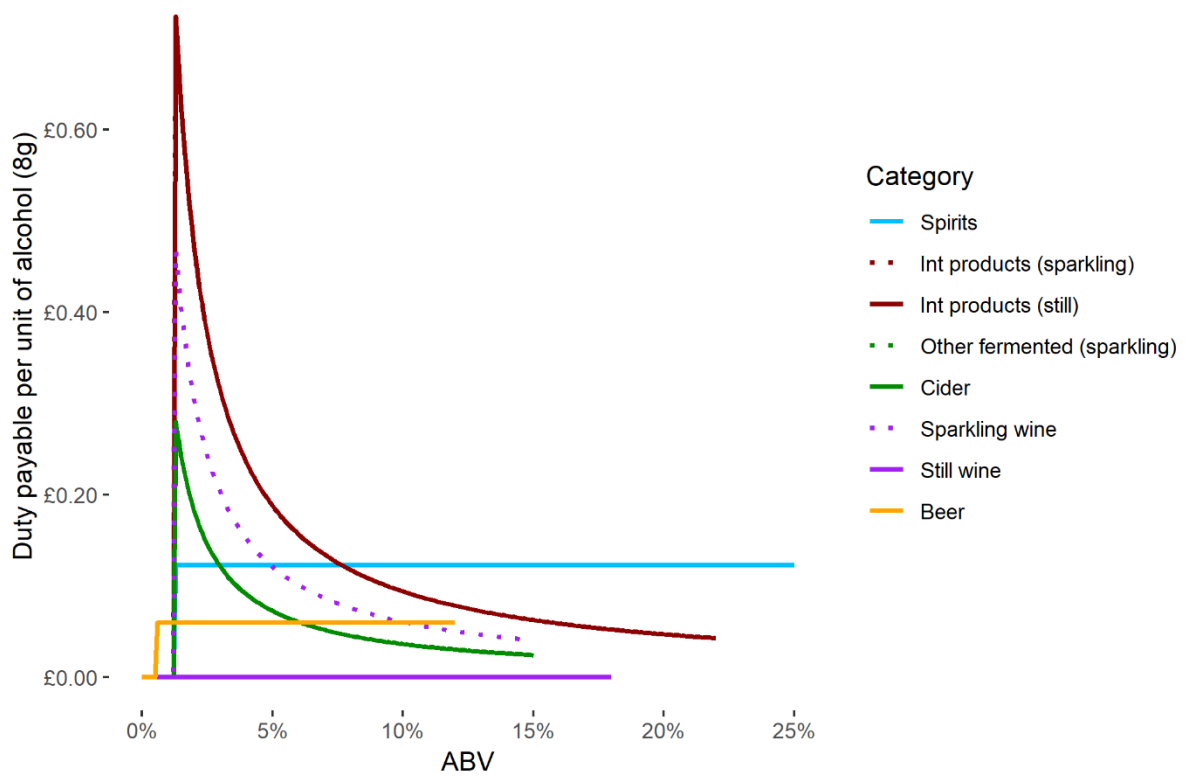

### Ireland

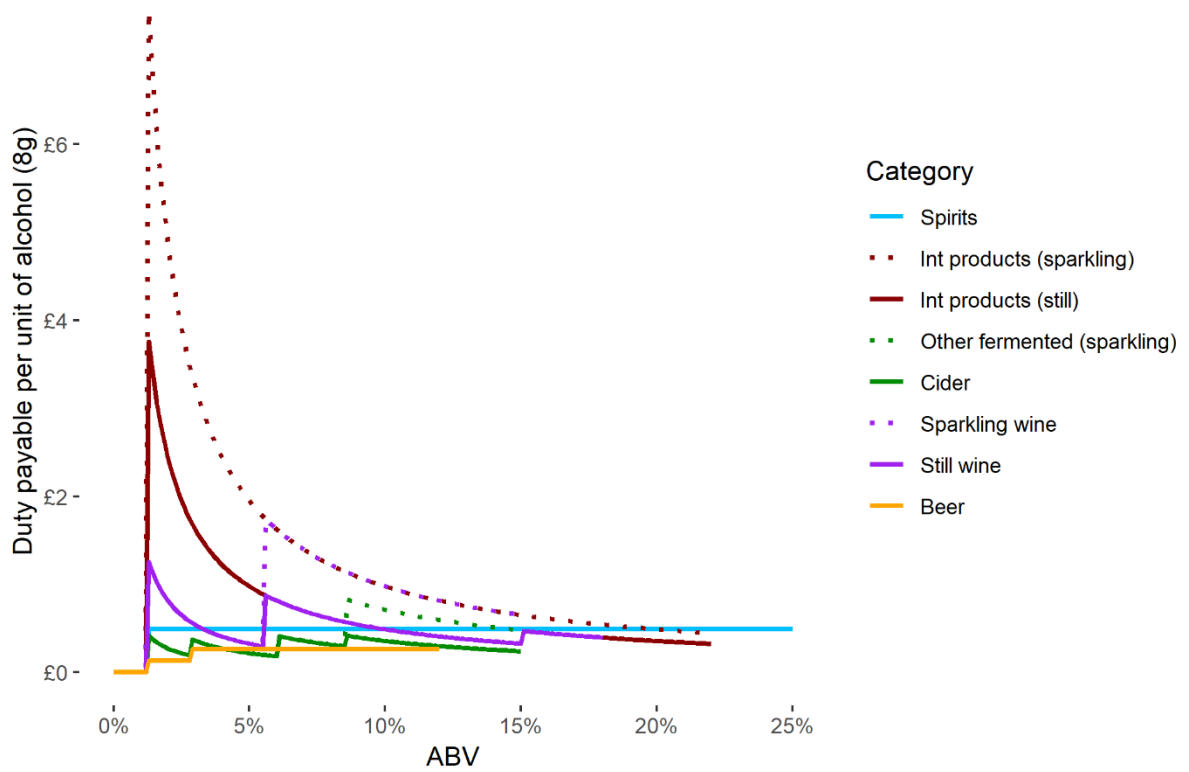



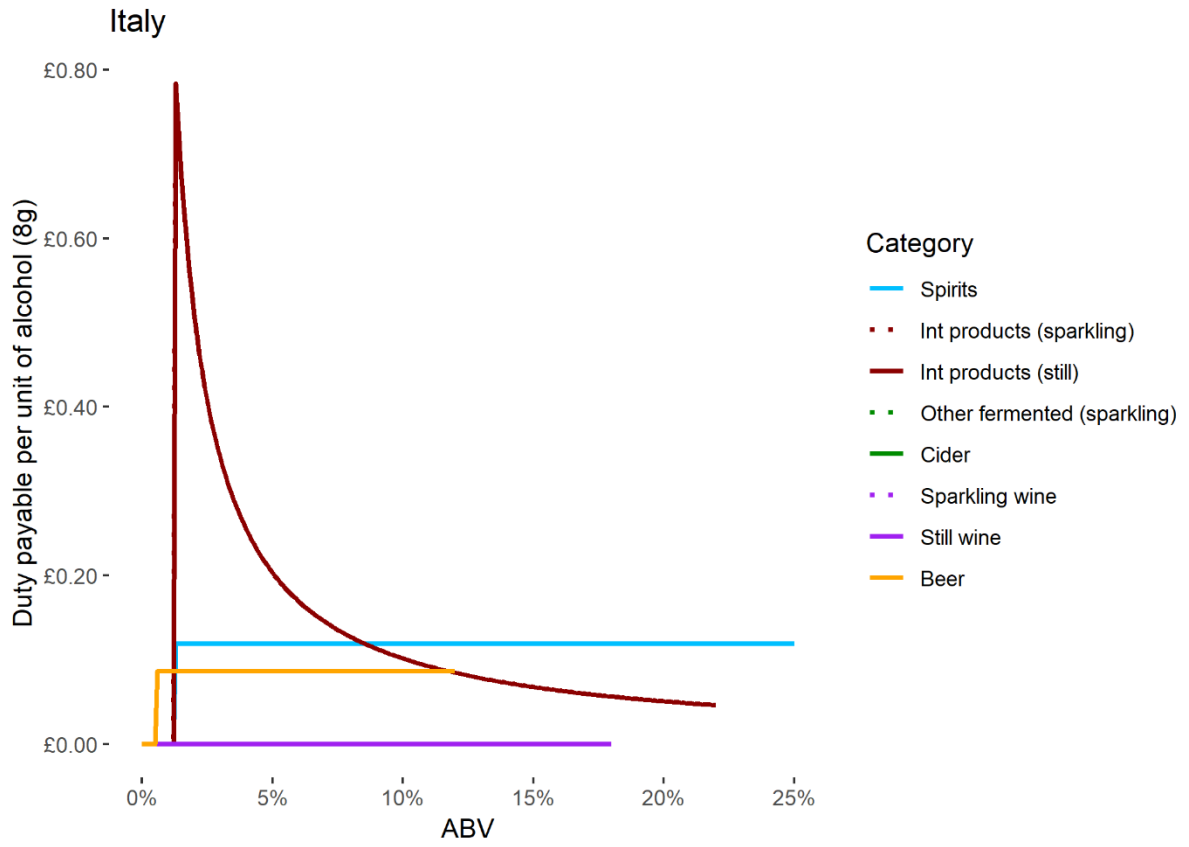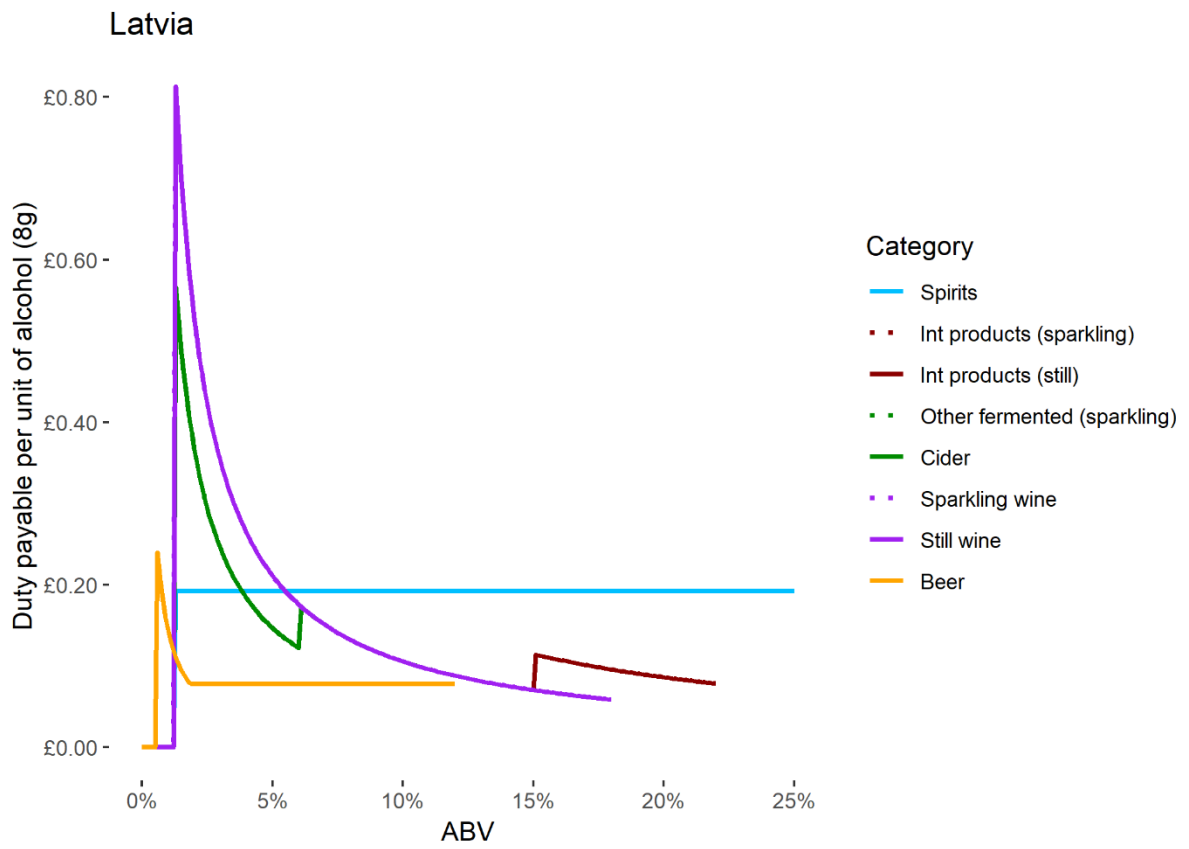

### Lithuania

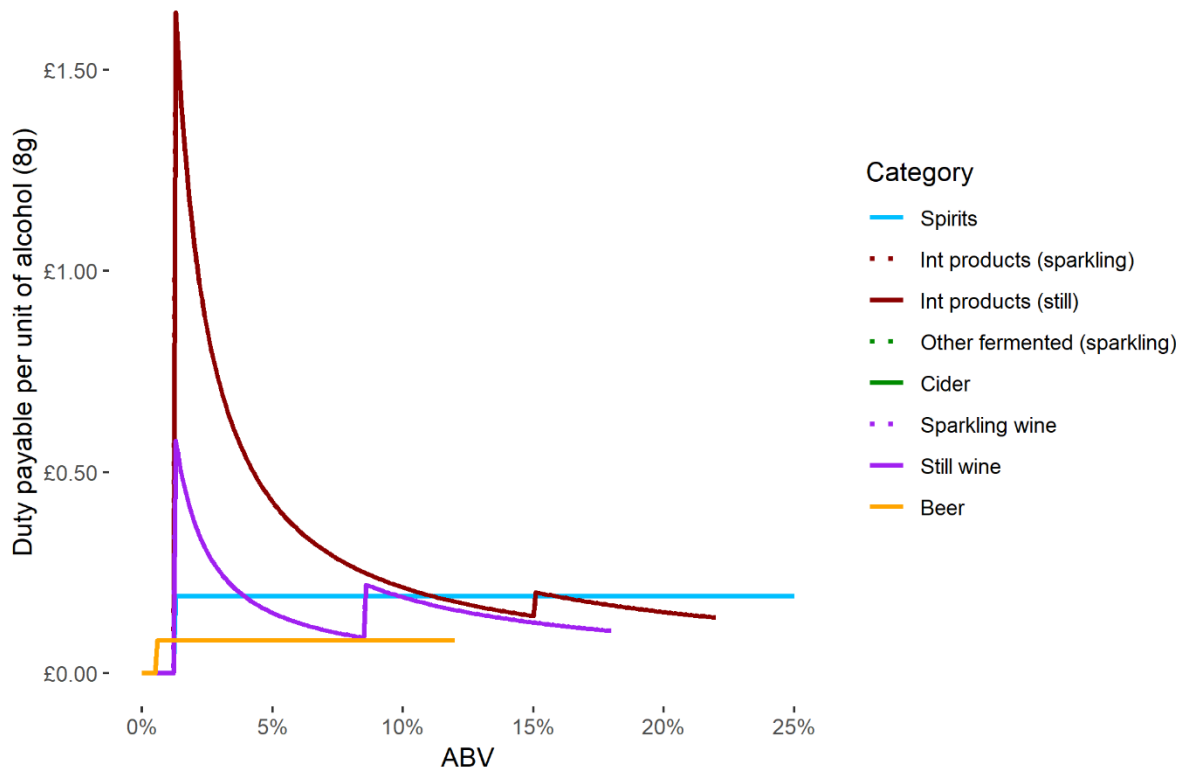

### Luxembourg

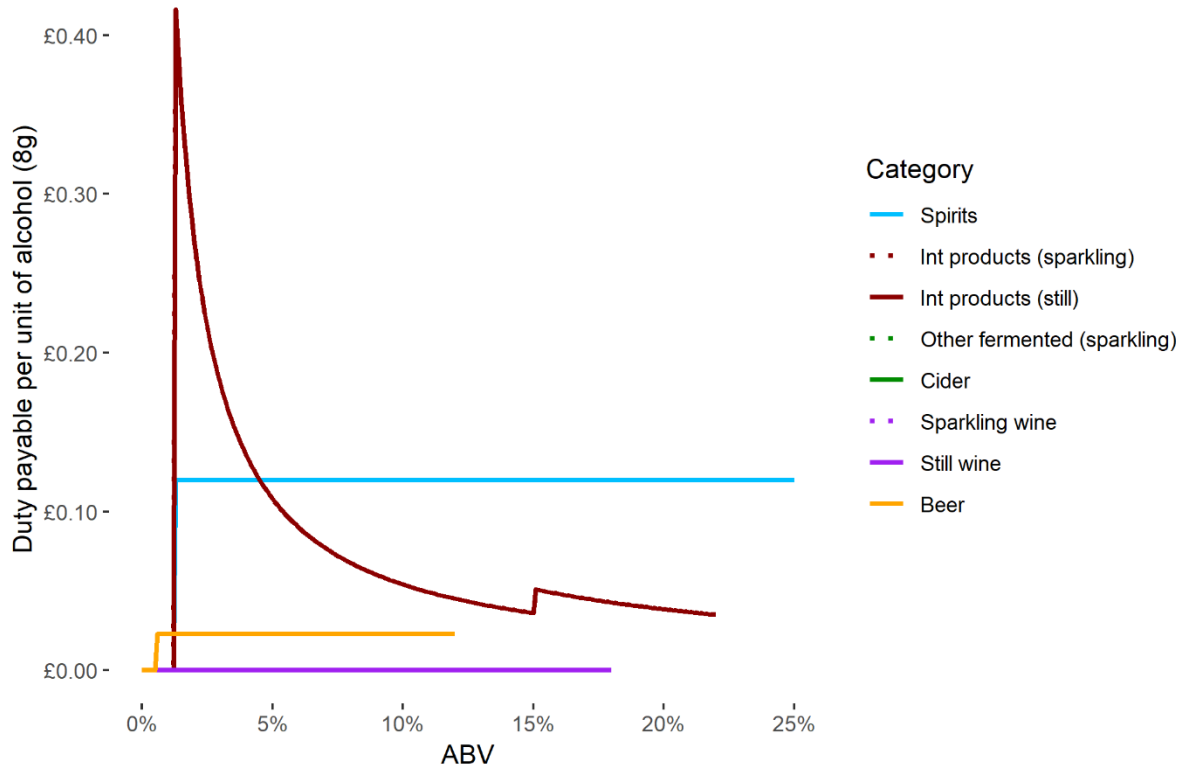

### Malta

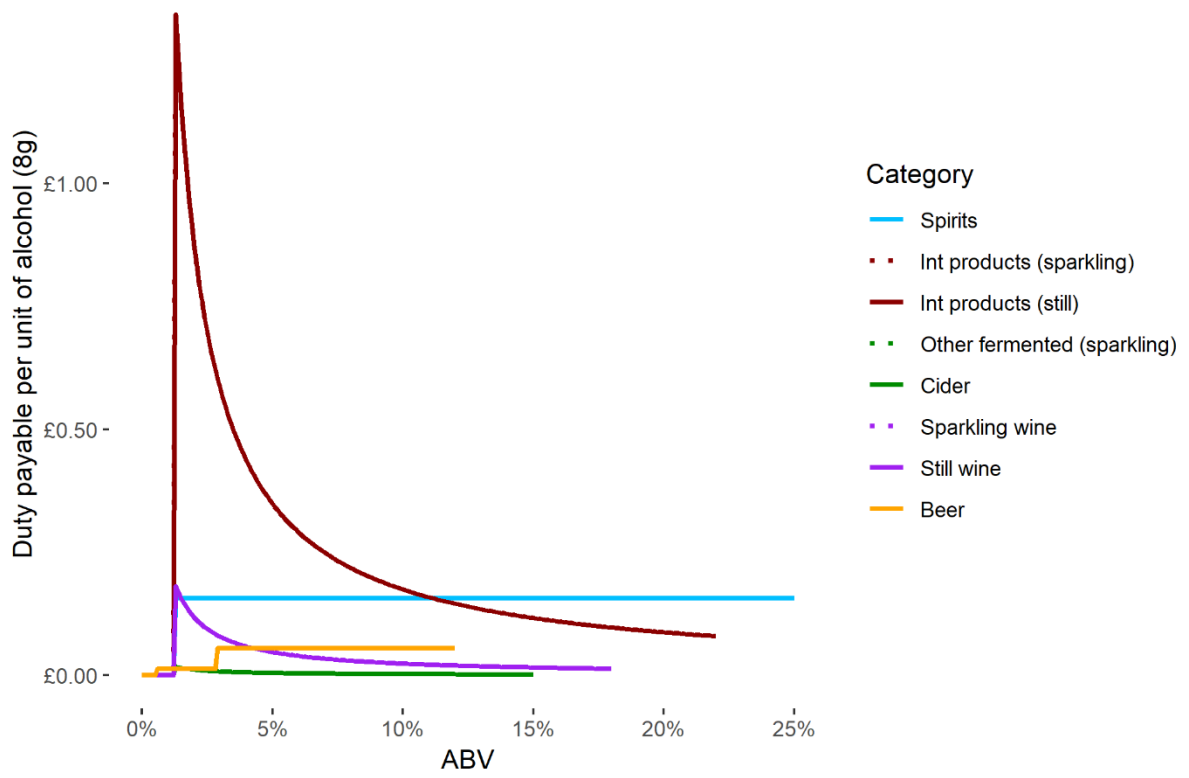

### Netherlands

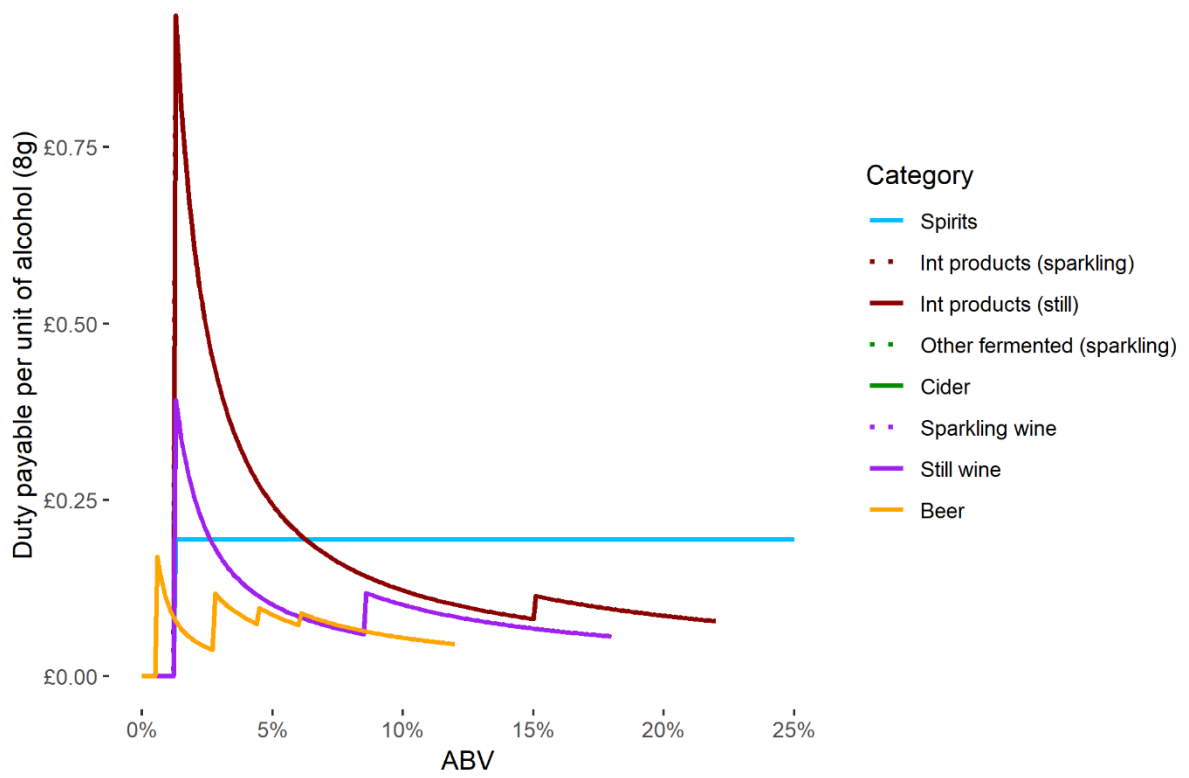

### Poland

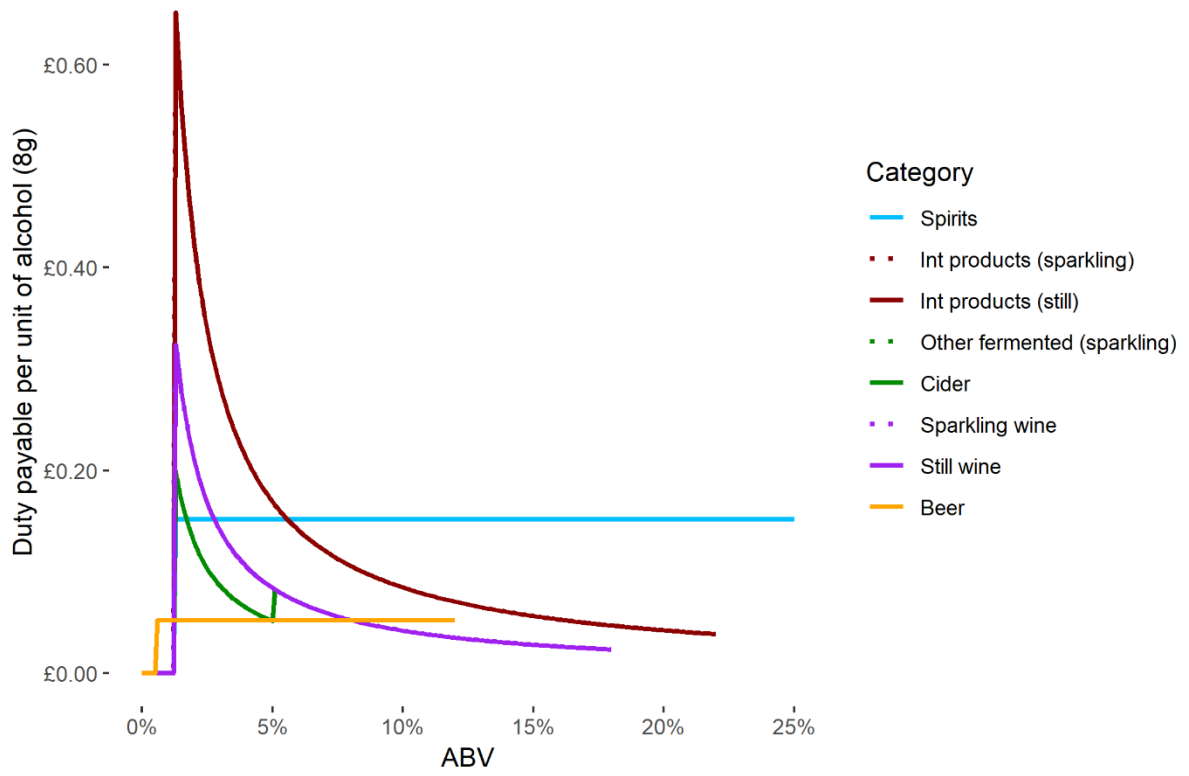

### Portugal

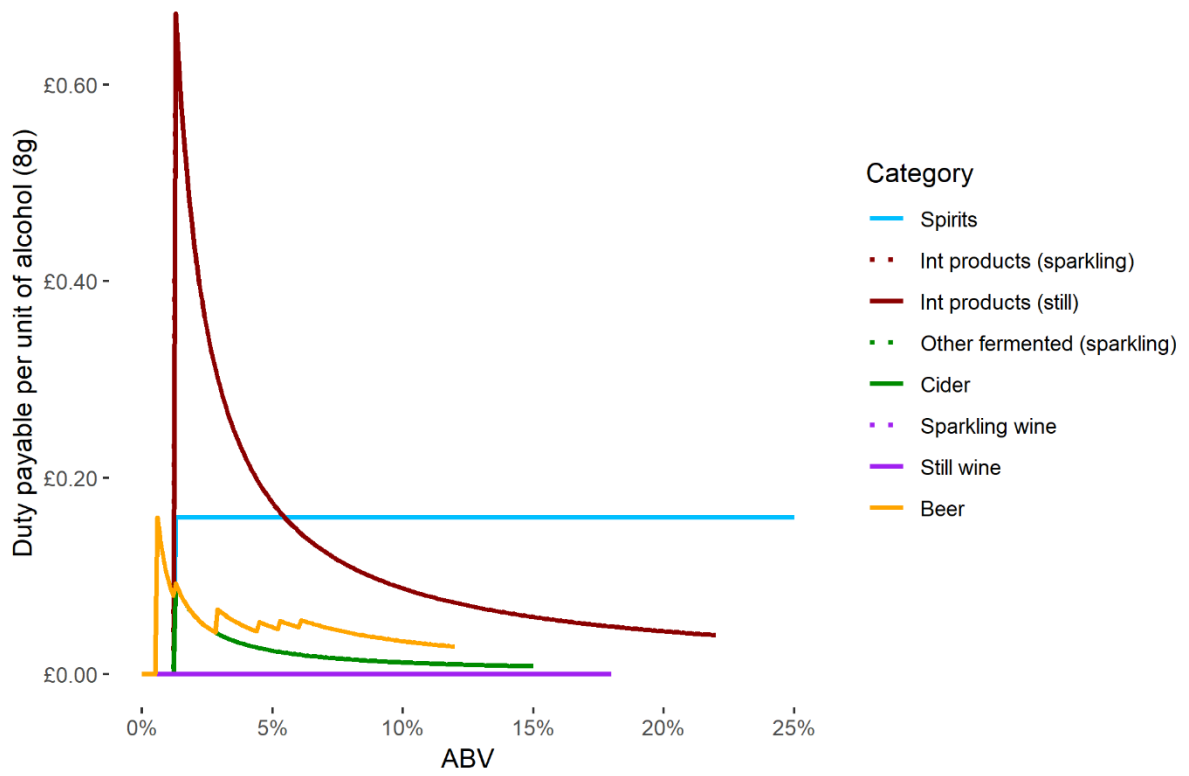

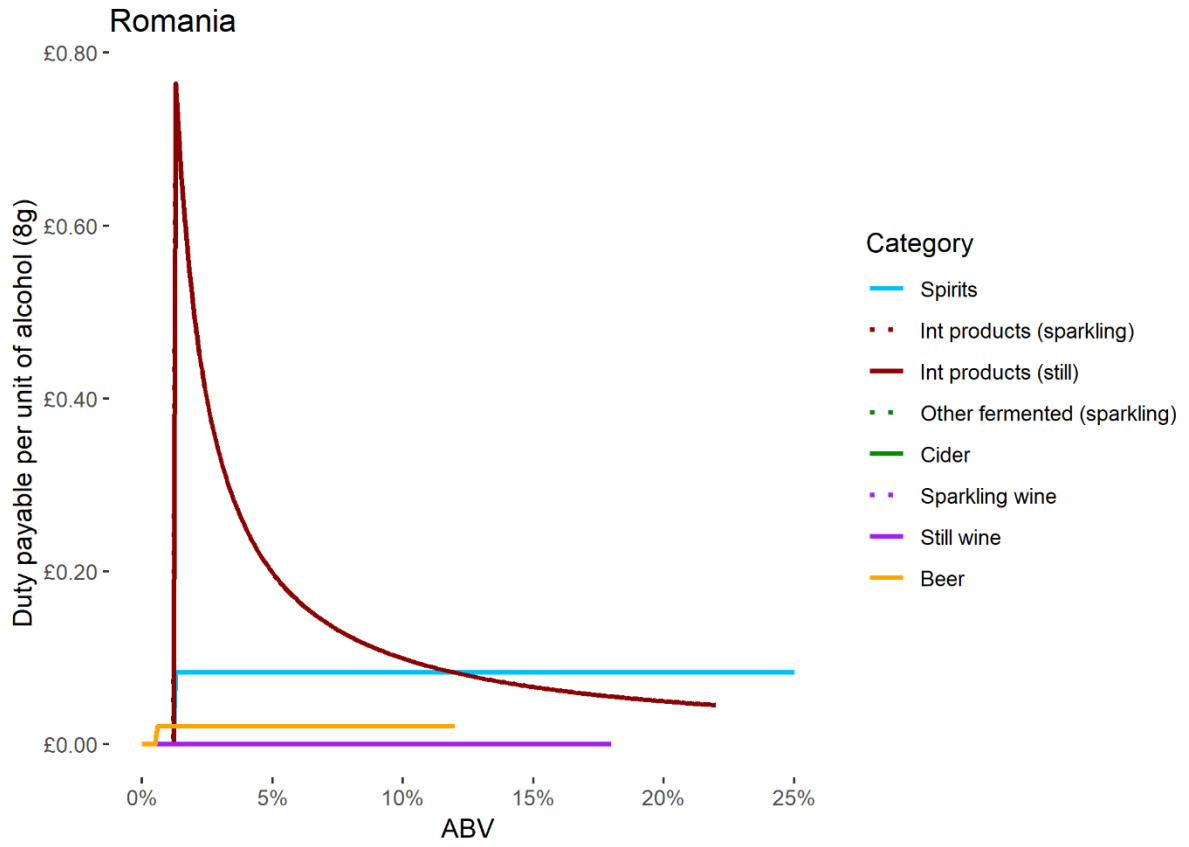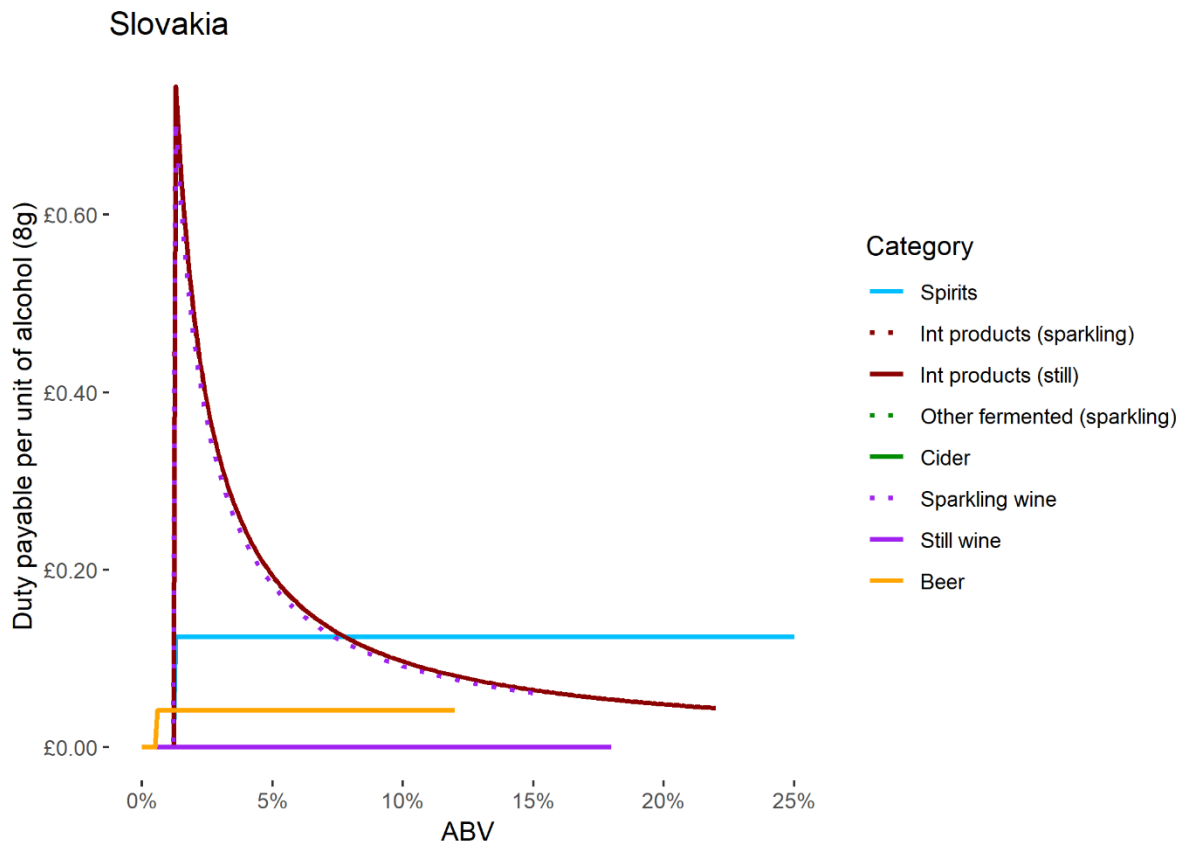

### Slovenia

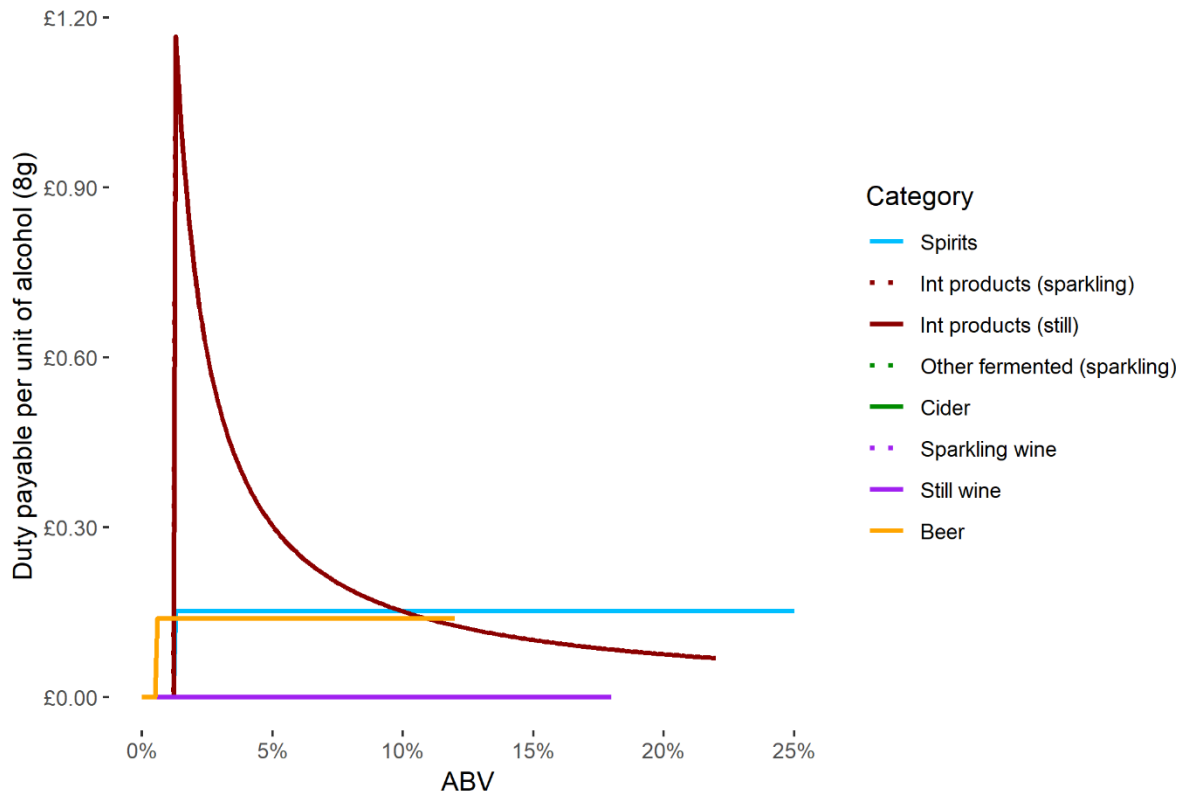

### Spain

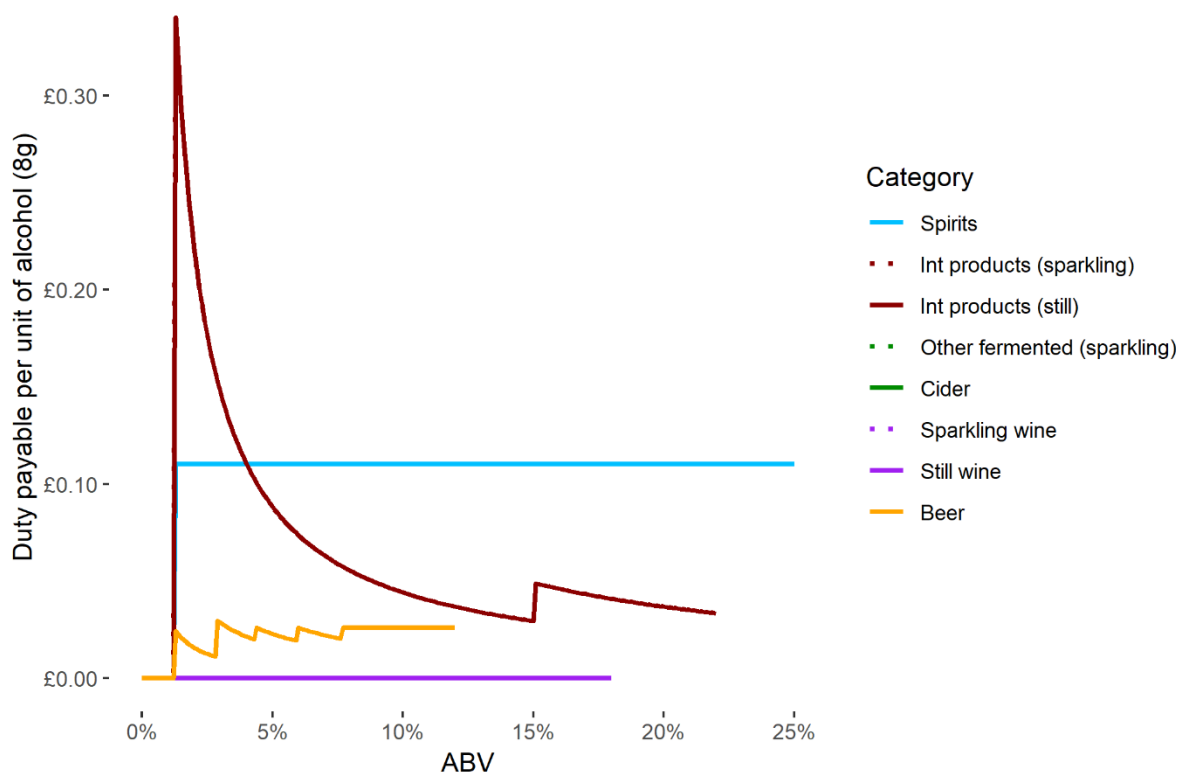

### Sweden

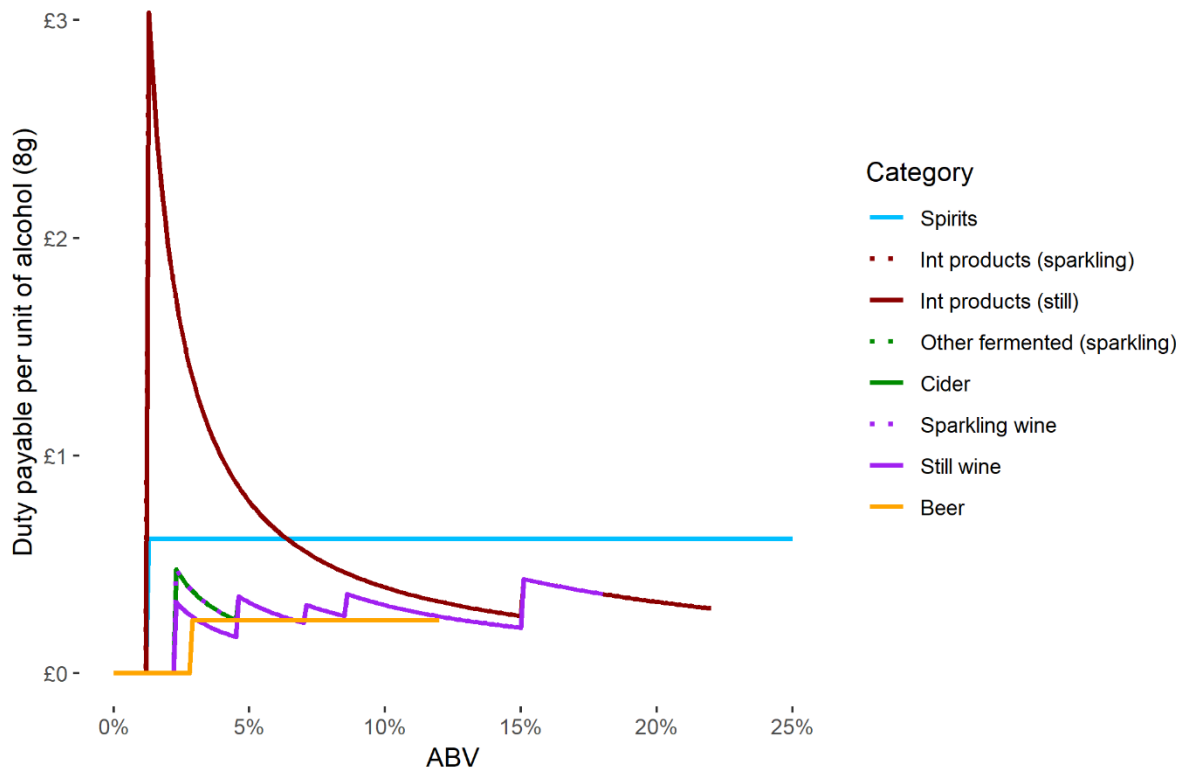

### UK

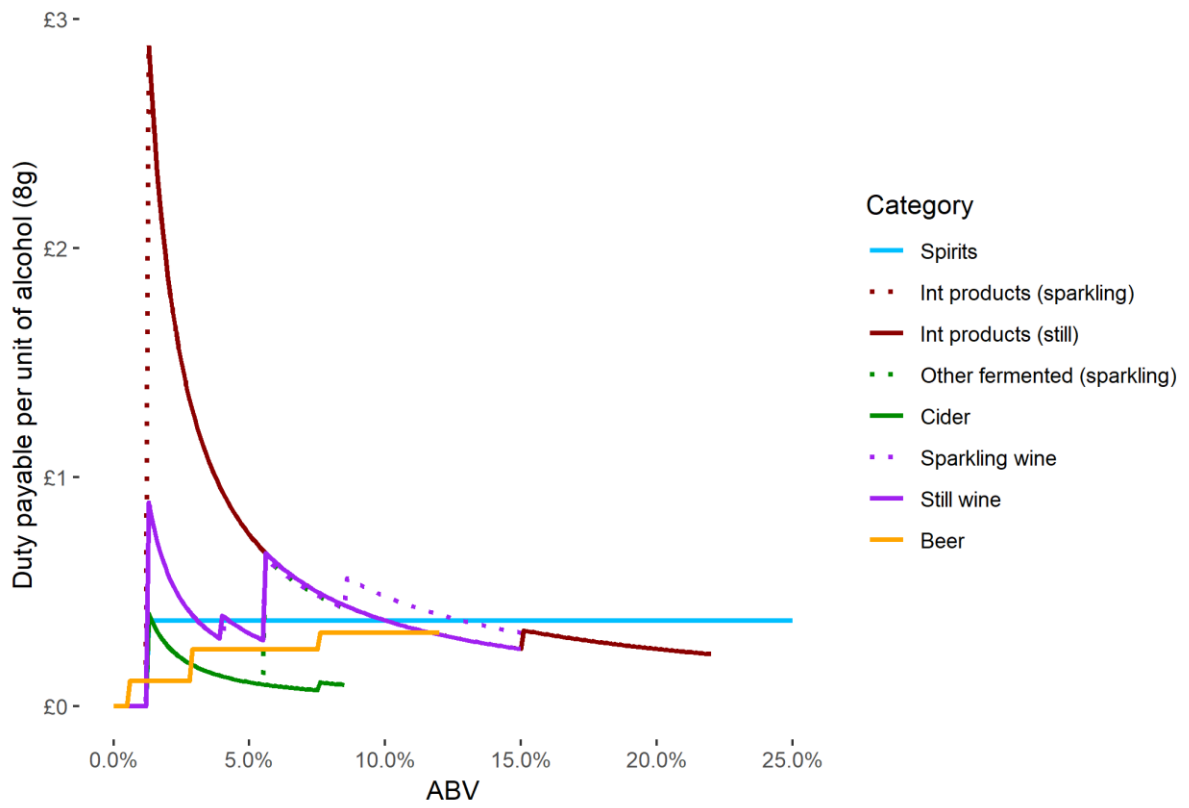

Figure S2: PPP-adjusted alcohol duty rates in 28 EU member states

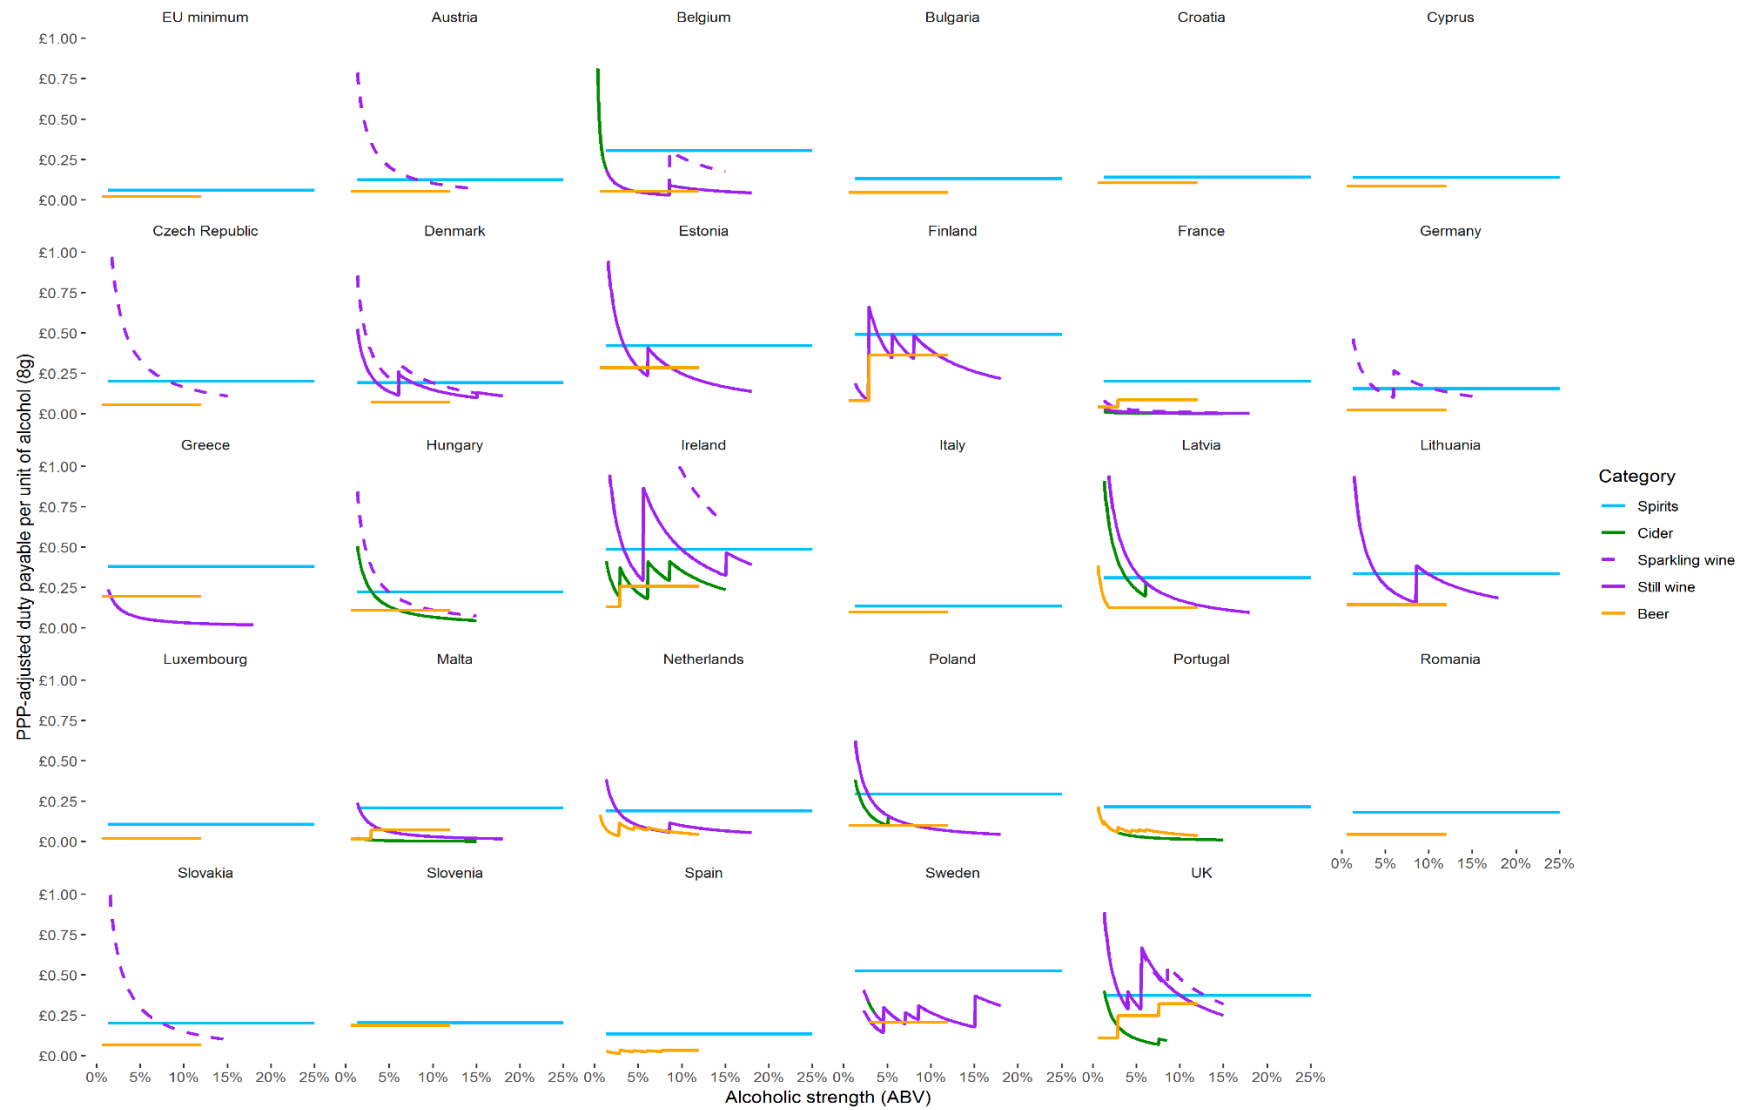



Figure S3: Map of PPP-adjusted duty rates for selected products:

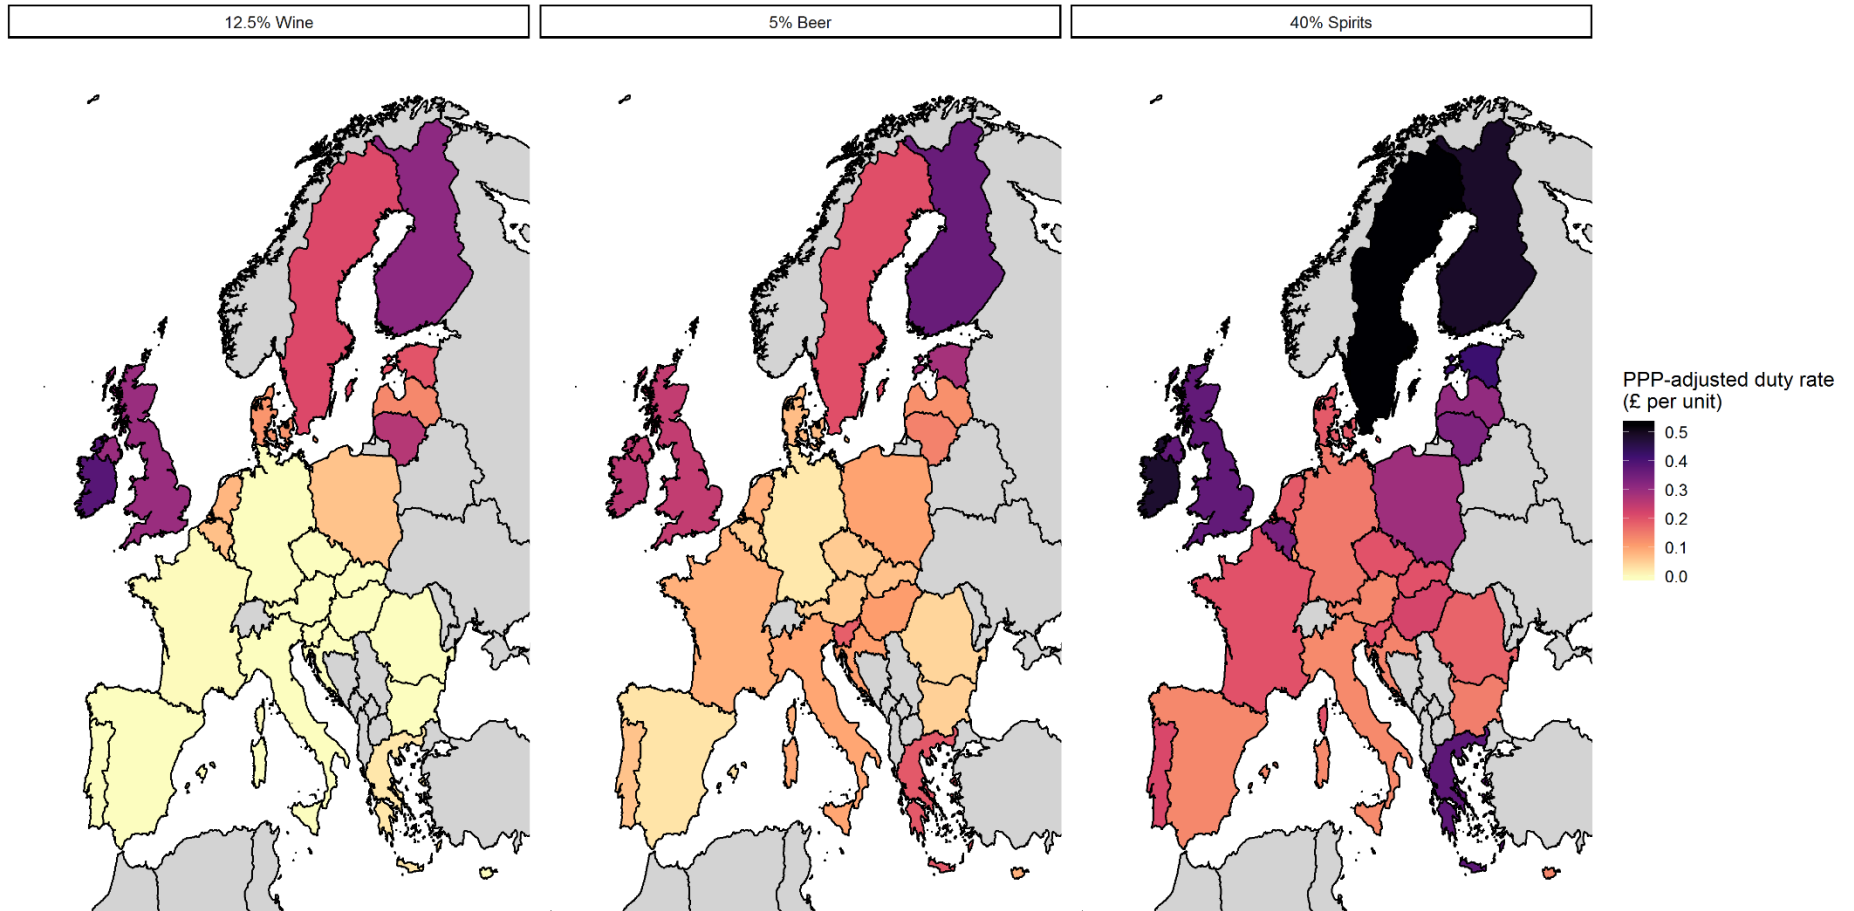

Figure 4: PPP-adjusted duty rates for selected products

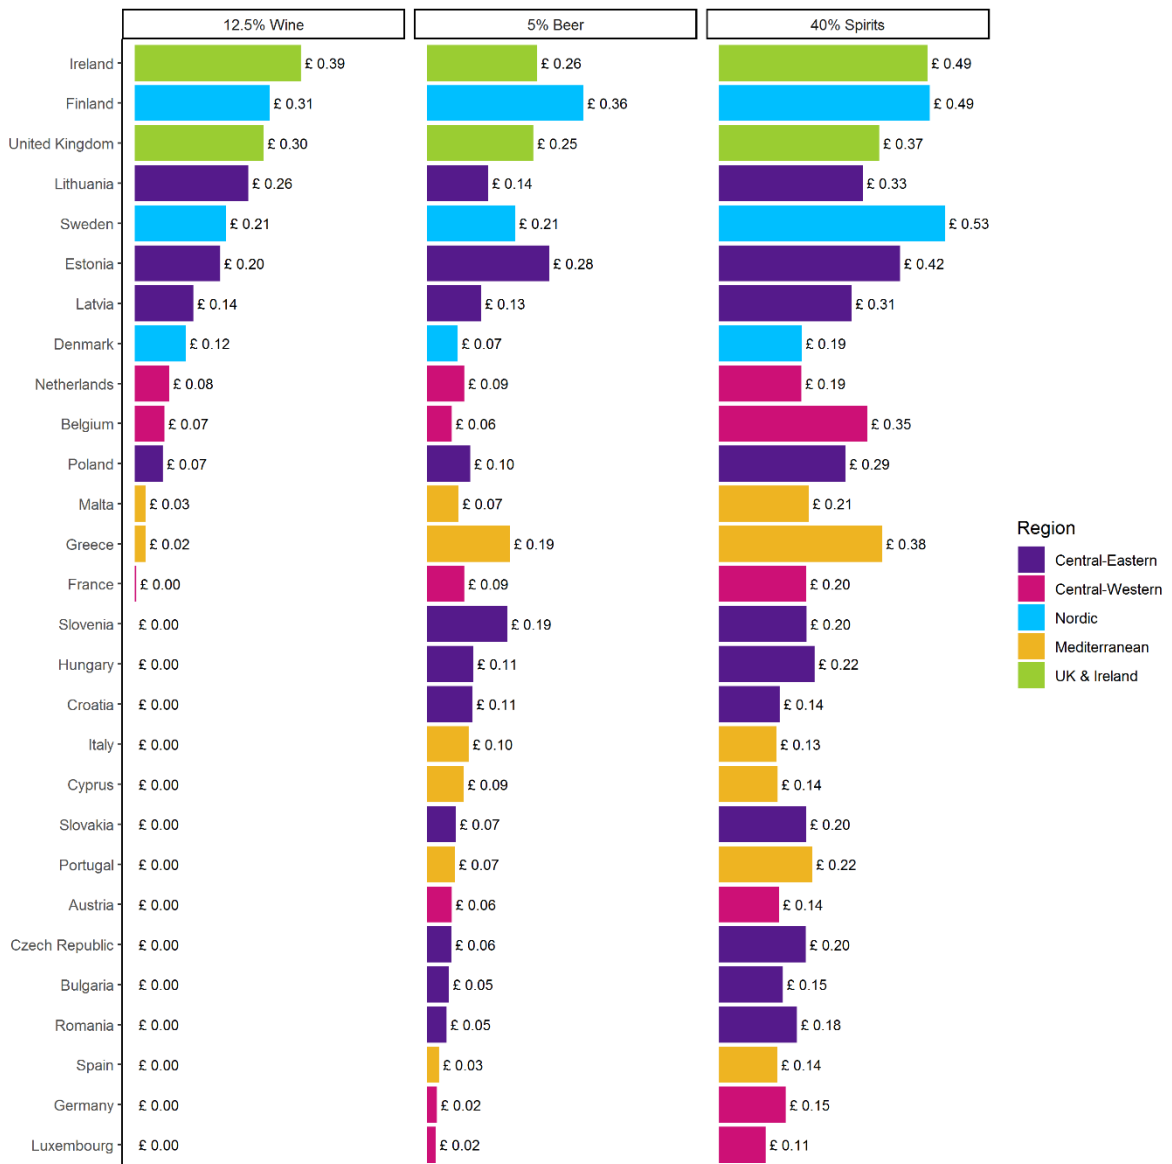

Supplement: ADD-114-1489-s001.pdf [file ADD-114-1489-s001.pdf]
